# Supplementary material
Source: PubMed Central journal article supplement (PMC4767537)
Supplement: NIHMS744482-supplement-supplement_1.pdf [file NIHMS744482-supplement-supplement_1.pdf]

## ***Supplementary Material***

**The antibody response to *Porphyromonas gingivalis* in relation to anti-citrullinated protein antibodies, smoking and *HLA-DRB1* shared epitope in rheumatoid arthritis**

*Kharlamova et al.*

### **SUPPLEMENTARY METHODS**

#### ***RgpB IgG ELISA***

High-binding Nunc MaxiSorp plates were coated over night (ON) at 4°C, with RgpB protein (2.5µg/ml) in 50mM carbonate buffer; washed in PBS-Tween (0.05%) and blocked (2% BSA in PBS) ON at 4°. Serum, diluted 1:800 in RIA-buffer (1% BSA, 350mM NaCl, 10mM Tris-HCl (pH 7.6), 1% Triton X-100, 0.1% SDS), was incubated for 1.5h at room temperature (RT). Plates were then washed and incubated for 1h at RT with peroxidase-conjugated goat anti-human IgG (diluted 1:10.000 in RIA-buffer). Bound antibodies were detected using tetramethylbenzidine substrate (Sigma). The colour reaction was stopped with 0.5M H<sub>2</sub>SO<sub>4</sub>. Absorbance was measured at 450nm. Antibody levels were presented as arbitrary units (AU/ml), based on a standard curve made from a serially diluted highly positive serum pool.

***Supplementary Material***

**The antibody response to *Porphyromonas gingivalis* in relation to anti-citrullinated protein antibodies, smoking and *HLA-DRB1* shared epitope in rheumatoid arthritis**

*Kharlamova et al.*

**SUPPLEMENTARY TABLE 1**

Supplementary Table 1. Associations between anti-RgpB IgG exposure and RA in subgroups of patients based on the presence/absence of ACPA fine-specificities, RF, anti-Carb-fib and anti-CCP antibodies

| ACPA; anti-Carb-fib; RF /<br>anti-CCP antibodies | Anti-RgpB IgG  |                | OR*        | 95%CI           |
|--------------------------------------------------|----------------|----------------|------------|-----------------|
|                                                  | Negative N (%) | Positive N (%) |            |                 |
| <b>CEP-1/CCP</b>                                 |                |                |            |                 |
| Controls                                         | 341 (90.45)    | 36 (9.55)      | 1.0        | ref.            |
| -/-                                              | 559 (79.63)    | 143 (20.37)    | <b>2.5</b> | <b>1.6-3.8</b>  |
| -/+                                              | 441 (76.43)    | 136 (23.57)    | <b>3.2</b> | <b>2.1-4.9</b>  |
| +/-                                              | 16 (66.67)     | 8 (33.33)      | <b>5.6</b> | <b>1.8-17.3</b> |
| +/+                                              | 502 (74.81)    | 169 (25.19)    | <b>3.5</b> | <b>2.3-5.4</b>  |
| -/+                                              | 1000 (78.19)   | 279 (21.81)    | <b>2.8</b> | <b>1.8-4.1</b>  |
| +/+                                              | 518 (74.53)    | 177 (25.47)    | <b>3.6</b> | <b>2.3-5.4</b>  |
| <b>Cit-vim<sub>60-75</sub>/CCP</b>               |                |                |            |                 |
| Controls                                         | 341 (90.45)    | 36 (9.55)      | 1.0        | ref.            |
| -/-                                              | 558 (79.15)    | 147 (20.85)    | <b>2.5</b> | <b>1.7-3.9</b>  |
| -/+                                              | 403 (75.89)    | 128 (24.11)    | <b>3.3</b> | <b>2.2-5.2</b>  |
| +/-                                              | 17 (80.95)     | 4 (19.05)      | 2.6        | 0.7-10.3        |
| +/+                                              | 540 (75.31)    | 177 (24.69)    | <b>3.4</b> | <b>2.2-5.1</b>  |
| -/+                                              | 961 (77.75)    | 275 (22.25)    | <b>2.9</b> | <b>1.9-4.3</b>  |
| +/+                                              | 557 (75.47)    | 181 (24.53)    | <b>3.3</b> | <b>2.2-5.0</b>  |
| <b>Cit-C1/CCP</b>                                |                |                |            |                 |
| Controls                                         | 341 (90.45)    | 36 (9.55)      | 1.0        | ref.            |
| -/-                                              | 518 (80.06)    | 129 (19.94)    | <b>2.4</b> | <b>1.5-3.7</b>  |
| -/+                                              | 455 (76.60)    | 139 (23.40)    | <b>3.0</b> | <b>2.0-4.6</b>  |
| +/-                                              | 57 (72.15)     | 22 (27.85)     | <b>4.1</b> | <b>2.1-8.1</b>  |
| +/+                                              | 488 (74.62)    | 166 (25.38)    | <b>3.6</b> | <b>2.4-5.5</b>  |
| -/+                                              | 973 (78.40)    | 268 (21.60)    | <b>2.7</b> | <b>1.8-4.0</b>  |
| +/+                                              | 545 (74.35)    | 188 (25.65)    | <b>3.6</b> | <b>2.4-5.5</b>  |
| <b>Cit-fib<sub>36-52</sub>/CCP</b>               |                |                |            |                 |
| Controls                                         | 341 (90.45)    | 36 (9.55)      | 1.0        | ref.            |
| -/-                                              | 552 (79.08)    | 146 (20.92)    | <b>2.5</b> | <b>1.7-3.9</b>  |
| -/+                                              | 553 (76.81)    | 167 (23.19)    | <b>3.0</b> | <b>2.0-4.6</b>  |
| +/-                                              | 23 (82.14)     | 5 (17.86)      | <b>3.4</b> | <b>1.0-11.0</b> |
| +/+                                              | 390 (73.86)    | 138 (26.14)    | <b>3.7</b> | <b>2.4-5.6</b>  |
| -/+                                              | 1105 (77.93)   | 313 (22.07)    | <b>2.8</b> | <b>1.9-4.1</b>  |
| +/+                                              | 413 (74.28)    | 143 (25.72)    | <b>3.6</b> | <b>2.3-5.6</b>  |
| <b>Anti-Carb-fib/CCP</b>                         |                |                |            |                 |
| Controls                                         | 341 (90.45)    | 36 (9.55)      | 1.0        | ref.            |
| -/-                                              | 456 (79.86)    | 115 (20.14)    | <b>2.4</b> | <b>1.6-3.8</b>  |
| -/+                                              | 267 (73.96)    | 94 (26.04)     | <b>3.8</b> | <b>2.4-6.1</b>  |
| +/-                                              | 119 (76.77)    | 36 (23.23)     | <b>3.3</b> | <b>1.9-5.8</b>  |
| +/+                                              | 676 (76.21)    | 211 (23.79)    | <b>3.2</b> | <b>2.1-4.8</b>  |
| -/+                                              | 723 (77.58)    | 209 (22.42)    | <b>2.9</b> | <b>1.9-4.4</b>  |
| +/+                                              | 795 (76.30)    | 247 (23.70)    | <b>3.1</b> | <b>2.1-4.7</b>  |
| <b>RF/CCP</b>                                    |                |                |            |                 |
| Controls                                         | 341 (90.45)    | 36 (9.55)      | 1.0        | ref.            |
| -/-                                              | 398 (78.81)    | 107 (21.19)    | <b>2.6</b> | <b>1.6-4.0</b>  |
| -/+                                              | 118 (74.68)    | 40 (25.32)     | <b>4.6</b> | <b>2.5-8.3</b>  |
| +/-                                              | 177 (80.09)    | 44 (19.91)     | <b>2.7</b> | <b>1.6-4.7</b>  |
| +/+                                              | 825 (75.69)    | 265 (24.31)    | <b>3.2</b> | <b>2.1-4.8</b>  |
| -/+                                              | 516 (77.83)    | 147 (22.17)    | <b>2.9</b> | <b>1.9-4.4</b>  |
| +/+                                              | 1002 (76.43)   | 309 (23.57)    | <b>3.1</b> | <b>2.1-4.6</b>  |

\*: Odds ratios (OR) were adjusted for age, gender and residential area. ACPA= anti-citrullinated peptide/protein antibodies; Carb-fib= carbamylated fibrinogen; CCP= cyclic citrullinated peptide; CI= confidence interval; IgG= immunoglobulin G; RA= rheumatoid arthritis; RF= rheumatoid factor; RgpB= arginine gingipainB. CCP status was not considered in the following subsets: -/+ and +/+
